# Supplementary material for: Motion and dural sac compression in the upper cervical spine during the application of a cervical collar in case of unstable craniocervical junction—A study in two new cadaveric trauma models
Source: PLoS One. 2018 Apr 6;13(4):e0195215. doi: 10.1371/journal.pone.0195215 (PMC5889057; doi:10.1371/journal.pone.0195215)
Supplement: S1 Table — (XLSX) [file pone.0195215.s002.xlsx]

## Sheet: Sheet1
		Stable	AOD	AOD + AAI	P value of stable vs AOD	P value of stable vs AOD + AAI	P value of AOD vs AOD + AAI
	Change in WDS at C0/C1 level [mm]	-0.21 (-0.49 to 0.13)	-1.10 (-1.28 to -0.67)	-1.19 (-1.56 to -0.63)	0.028*	0.028*	0.207
	Change in WDS at C1/C2 level [mm]	-0.14 (-0.43 to 0.09)	-0.04 (-0.48 to 0.09)	-.0.02 (-0.43 to 0.12)	0.893	0.833	0.753
	Change in Angulation at C0/C1 level [°]	3.28 (2.88 to 4.66)	4.89 (3.80 to 6.98)	4.40 (3.68 to 5.89)	0.028*	0.116	0.345
	Change in Angulation at C1/C2 level [°]	2.12 (0.96 to 4.21)	3.10 (1.19 to 4.15)	2.90 ( 1.14 to 3.42)	0.345	0.463	0.917
	Change in Distraction [mm]	0.91 (0.64 to 1.75)	0.66 (0.05 to 1.77)	1.10 (0.53 to 2.13)	0.273	0.5	0.345
	Overall motion in flexion [°]	12.50 (5.42 to 18.74)	15.09 (11.80 to 22.93)	15.74 (9.30 to 22.08)	0.249	0.249	0.917
	Overall motion in rotation [°]	11.01 (3.63 to 17.33)	10.32 (2.32 to 17.07)	14.52 (3.75 to 19.05)	0.753	0.116	0.345
	Overall motion in lateral bending [°]	7.89(3.94 to 13.84)	11.37 (4.01 to 16.75)	9.88 (3.41 to 14.81)	0.345	0.6	0.463
